# Supplementary material for: Surveying Parents’ Awareness and Adherence to Influenza Vaccination Recommendations in Children in Southern Italy
Source: MDPI journal article supplement (doi:10.3390/vaccines10081298), 2022-08-11
Supplement: s1 [file s1]

## QUESTIONNAIRE

### Section A. Socio-demographic and anamnestic characteristics

- A1.** Gender: ☐ male ☐ female ☐ other, specify \_\_\_\_\_
- A2.** What is your nationality? ☐ Italian ☐ other nationality, specify \_\_\_\_\_
- A3.** What is your date of birth? **d**\_\_\_\_/**m**\_\_\_\_/**y**\_\_\_\_
- A4.** What is your marital status? ☐ married ☐ separated ☐ divorced ☐ widowed ☐ cohabitant  
☐ unmarried ☐ other, specify \_\_\_\_\_
- A5.** What is your occupation? \_\_\_\_\_
- A6.** What is your partner's occupation?(If applicable) \_\_\_\_\_
- A7.** What is the highest level of education that you have completed? ☐ none ☐ primary school ☐ middle school ☐ high school ☐ university degree ☐ other, specify \_\_\_\_\_
- A8.** What is the highest level of education that your partner completed?(If applicable) ☐ none ☐ primary school ☐ middle school ☐ high school ☐ university degree ☐ other, specify \_\_\_\_\_
- A9.** Have you ever received a influenza vaccination? ☐ no (**Go to A11**) ☐ yes, when? (**more than one answer allowed**)  
☐ 2018\19 influenza season ☐ 2019\20 influenza season ☐ 2020\21 influenza season ☐ 2021\22 influenza season
- A10.** In the hours or days following vaccination, did you have any side effects attributable to the vaccine ☐ no ☐ yes, which ones? \_\_\_\_\_
- A11.** How many sons/daughters do you have: n. \_\_\_\_ What is your child's date of birth? **d**\_\_\_\_/**m**\_\_\_\_/**y**\_\_\_\_
- A12.** Does your child suffer from chronic diseases? ☐ no ☐ yes, which ones? ☐ cardiovascular diseases ☐ respiratory diseases ☐ diabetes ☐ oncohematological diseases ☐ neuromuscular diseases ☐ other, specify \_\_\_\_\_
- A13.** Have your child been examined by a physician in the last 12 months? ☐ no  
☐ yes, primary care physician, how many times?\_\_\_\_\_ ☐ yes, pediatrician, how many times?\_\_\_\_\_  
☐ yes, other specialist, specify\_\_\_\_\_, how many times?\_\_\_\_\_

### B. Knowledge regarding influenza and related vaccination

- B1.** In the following table, please indicate which vaccinations are mandatory or recommended for 6 months-6 years old children:

| Vaccine against              | yes                      | no                       | uncertain                | Vaccine against       | yes                      | no                       | uncertain                |
|------------------------------|--------------------------|--------------------------|--------------------------|-----------------------|--------------------------|--------------------------|--------------------------|
| Diphtheria/tetanus/pertussis | <input type="checkbox"/> | <input type="checkbox"/> | <input type="checkbox"/> | Poliomyelitis         | <input type="checkbox"/> | <input type="checkbox"/> | <input type="checkbox"/> |
| Hepatitis B                  | <input type="checkbox"/> | <input type="checkbox"/> | <input type="checkbox"/> | Rotavirus             | <input type="checkbox"/> | <input type="checkbox"/> | <input type="checkbox"/> |
| Meningococcus A,C,W,Y        | <input type="checkbox"/> | <input type="checkbox"/> | <input type="checkbox"/> | Varicella             | <input type="checkbox"/> | <input type="checkbox"/> | <input type="checkbox"/> |
| Meningococcus B              | <input type="checkbox"/> | <input type="checkbox"/> | <input type="checkbox"/> | Measles,mumps,rubella | <input type="checkbox"/> | <input type="checkbox"/> | <input type="checkbox"/> |
| Papillomavirus (HPV)         | <input type="checkbox"/> | <input type="checkbox"/> | <input type="checkbox"/> | Influenza             | <input type="checkbox"/> | <input type="checkbox"/> | <input type="checkbox"/> |

- B2.** Influenza is a transmissible disease. Do you know how is it transmitted? (**more than one answer allowed**)  
☐ droplets ☐ foods and drinks ☐ contact with animals ☐ contact with contaminated surfaces ☐ uncertain ☐ other, specify\_\_\_\_\_
- B3.** Do you know how can influenza be prevented? (**more than one answer allowed**)  
☐ avoiding crowded places ☐ frequent disinfection of surfaces ☐ frequent handwashing ☐ room ventilation ☐ using masks ☐ keeping the distance of at least 1 mt ☐ avoiding touching one's face ☐ vaccination  
☐ uncertain ☐ other, specify\_\_\_\_\_
- B4.** In Italy, influenza vaccination is recommended to: (**more than one answer allowed**)  
☐ elderly ☐ health workers ☐ pregnant women ☐ healthy 6 months- 6 years old children ☐ persons of all ages with chronic conditions ☐ other, specify \_\_\_\_\_

### C. Attitudes and behaviors towards influenza and related vaccination

- C1.** Please indicate whether you agree, disagree or are uncertain with the following statements:

|                                                                                                | Agree                    | Uncertain                | Disagree                 |
|------------------------------------------------------------------------------------------------|--------------------------|--------------------------|--------------------------|
| It is better for children to acquire immunization through illness than through the vaccination | <input type="checkbox"/> | <input type="checkbox"/> | <input type="checkbox"/> |
| There are too many vaccinations for children                                                   | <input type="checkbox"/> | <input type="checkbox"/> | <input type="checkbox"/> |

|                                                                                            |                          |                          |                          |
|--------------------------------------------------------------------------------------------|--------------------------|--------------------------|--------------------------|
| I am confident on the information about vaccinations for my child provided by my physician | <input type="checkbox"/> | <input type="checkbox"/> | <input type="checkbox"/> |
| Influenza vaccination protects against severe complications                                | <input type="checkbox"/> | <input type="checkbox"/> | <input type="checkbox"/> |

**C2.** On a 1 to 10 scale, how much are you concerned that your child can develop influenza?

NOT AT ALL WORRIED 1 2 3 4 5 6 7 8 9 10 EXTREMELY WORRIED

**C3.** On a 1 to 10 scale, how much are you worried that the Influenza could have serious effects on your child's health?

NOT AT ALL WORRIED 1 2 3 4 5 6 7 8 9 10 EXTREMELY WORRIED

**C4.** On a 1 to 10 scale, how much is vaccination useful to prevent influenza in children?

NOT AT ALL USEFUL 1 2 3 4 5 6 7 8 9 10 EXTREMELY USEFUL

**C5.** Please indicate which of the following vaccination(s) has/have been uptaken by your child:

☐ diphtheria ☐ tetanus ☐ pertussis ☐ poliomyelitis ☐ measles ☐ mumps ☐ rubella ☐ varicella  
☐ meningococcus ACYW ☐ influenza

**C6.** Has your child ever received influenza vaccination? ☐ no ☐ yes, when? ☐ 2018\19 influenza seasons  
☐ 2019\20 influenza seasons ☐ 2020\21 influenza seasons ☐ 2021\22 influenza seasons

**C7.** Do you intend to vaccinate your child in the upcoming 2022\2023 influenza season?

| <input type="checkbox"/> No, why? (more than one answer allowed)                                                                                                                                                                                                                                                                                                                                                                                                                                               | <input type="checkbox"/> Yes, why? (more than one answer allowed)                                                                                                                                                                                                                                                                                                                                                                                                                                    |
|----------------------------------------------------------------------------------------------------------------------------------------------------------------------------------------------------------------------------------------------------------------------------------------------------------------------------------------------------------------------------------------------------------------------------------------------------------------------------------------------------------------|------------------------------------------------------------------------------------------------------------------------------------------------------------------------------------------------------------------------------------------------------------------------------------------------------------------------------------------------------------------------------------------------------------------------------------------------------------------------------------------------------|
| <input type="checkbox"/> The vaccine is not safe<br><input type="checkbox"/> The vaccine is not effective<br><input type="checkbox"/> I am against vaccinations<br><input type="checkbox"/> Not recommended by pediatrician/ primary care physician<br><input type="checkbox"/> The influenza vaccine contains heavy metals<br><input type="checkbox"/> The vaccine can cause serious side effects<br><input type="checkbox"/> My child is not at risk<br><input type="checkbox"/> I do not trust institutions | <input type="checkbox"/> The vaccine is safe<br><input type="checkbox"/> The vaccine is effective<br><input type="checkbox"/> I am favorable to vaccinations<br><input type="checkbox"/> It has been recommended by pediatrician/ primary care physician<br><input type="checkbox"/> To protect frail subjects<br><input type="checkbox"/> To distinguish influenza symptoms from those of COVID-19<br><input type="checkbox"/> My child is at risk<br><input type="checkbox"/> I trust institutions |

#### **D. Sources of information**

**D1.** What are your sources of information about vaccinations? (more than one answer allowed)

☐ none ☐ physician ☐ friends, relatives ☐ school ☐ tv, newspapers ☐ internet ☐ other, specify\_\_\_\_\_

**D2.** Do you feel you need more information about vaccination? ☐ no (**Stop**) ☐ yes

**D3.** Whom would you prefer to receive information from? (more than one answer allowed) ☐ friends, relatives ☐ physician ☐ school ☐ tv, newspapers ☐ other, specify\_\_\_\_\_

**Thank you for your participation to the survey!**
