# Supplementary material for: Surveying Parents’ Awareness and Adherence to Influenza Vaccination Recommendations in Children in Southern Italy
Source: MDPI journal article supplement (doi:10.3390/vaccines10081298), 2022-08-11
Supplement: s1 [file s1]

### Sample size calculation\*

The minimum sample size was calculated as follows:

$$n = \frac{Z^2 \frac{\alpha^2}{2} P(1 - P)}{d^2}$$

where,

P = estimated proportion

d = desired precision

$$n = \frac{1.96^2 0.50(0.50)}{0.025} = 384$$

\*Aday, L. A., Cornelius, L. J. (2006). *Designing and conducting health surveys: A comprehensive guide* (3rd ed.). Jossey-Bass.
